# Supplementary material for: Alluaudite LiMnPO4: a new Mn-based positive electrode for Li rechargeable batteries
Source: Royal Society of Chemistry journal article supplement (doi:10.1039/c4ta00955j), 2014-01-01
Supplement: c4ta00955j1.pdf [file c4ta00955j1.pdf]

**Supporting Information**

**Alluaudite  $\text{LiMnPO}_4$ : New Mn-based positive electrode for Li rechargeable  
batteries**

*Jongsoon Kim<sup>a</sup>, Hyungsub Kim<sup>a</sup>, Kyu-Young Park<sup>a</sup>, Young-Uk Park<sup>a</sup>, Seongsu Lee<sup>b</sup>,  
Hyung-Soon Kwon,<sup>a</sup> Han-Ill Yoo,<sup>a</sup> and Kisuk Kang<sup>a\*</sup>*

<sup>a</sup>Department of Materials Science and Engineering, Research Institute of Advanced Materials, Seoul National University, 599 Gwanak-ro, Gwanak-gu, Seoul 151-742, Korea

<sup>b</sup>Korea Atomic Energy Research Institute, P.O. Box 105, Yuseong-gu, Daejeon 305-600, Korea

Corresponding Author: Prof. Kisuk Kang

E-mail: [matlgen1@snu.ac.kr](mailto:matlgen1@snu.ac.kr)

TEL: +82-2-880-7088

## **S1. Experimental**

### **S1. 1. The synthesis of $\text{Na}_{0.67}\text{MnPO}_4$**

$\text{NaNO}_3$  (Sigma Aldrich, 98%),  $\text{Mn}_2\text{O}_3$  (Sigma Aldrich, 98%),  $\text{MnO}$  (Sigma Aldrich, 98%), and  $\text{NH}_4\text{H}_2\text{PO}_4$  (Fluka, 98%) with molar ratios of 0.67 : 0.33 : 0.67 : 1 were used as precursors. They were thoroughly mixed and grounded by high energy ball-milling. The mixed precursors were then fired at 350°C under  $\text{O}_2$  conditions for 5 hours. The mixture was then re-ground and manually pelletized using a disk-shaped mold. After pre-heating, we calcined the pellet at 685°C under  $\text{O}_2$  conditions for 10 hours.

### **S1. 2. The ion-exchange process of $\text{Li}_{0.67}\text{MnPO}_4$**

The powder was mixed with 5 times excess amount of the eutectic composition of  $\text{LiNO}_3$  (99%, Sigma Aldrich) and  $\text{LiCl}$  (99%, Sigma Aldrich). The mixture was heated at 280°C for 15 minute in air. After ion exchange, the mixture was rinsed/filtered with distilled water and ethanol several times. Finally, Li-containing powder was dried in air for a day in an oven.

### **S1. 3. Materials characterization**

The stoichiometry of the delithiated compound was determined by inductively coupled plasma-atomic emission spectroscopy (ICP-AES). Powder XRD of all materials was carried out on a Bruker D8-Advantage powder diffractometer using  $\text{Cu K}\alpha$  radiation (= 1.54178 Å) from  $2\theta = 10$  to  $60^\circ$  at 1s per step of  $0.01^\circ$ . The *ex-situ* XRD of fully lithiated alluaudite- $\text{LiFePO}_4$  was determined by XRD (Bruker D8 ADVANCE) with  $\text{Cu K}\alpha$  radiation (= 1.54178 Å). Data were recorded over a  $2\theta$  range of  $10^\circ$  to  $60^\circ$ , with a step size of  $0.01^\circ$ .

ND data were collected over a  $2\theta$  range between  $0^\circ$  and  $180^\circ$  with a step size of  $0.05^\circ$ , and  $\lambda = 1.388141 \text{ \AA}$  in  $a\text{-Na}_{0.67}\text{MnPO}_4$  and  $\lambda = 1.8348 \text{ \AA}$  in  $a\text{-Li}_{0.67}\text{MnPO}_4$  analysis were supplied by a Ge (331) single-crystal monochromator on a high-resolution powder diffractometer (HRPD) at the HANARO facility at the Korea Atomic Energy Research Institute. Structural refinements were done by the Rietveld method with Fullprof software. Mn K-edge X-ray absorption spectra (XAS) were taken on the 8C beamline at the Pohang Accelerator Laboratory (PAL). Mn K-edge energy calibration was performed using Mn metal foil as reference. A reference spectrum was simultaneously recorded for *in-situ* spectrum using Mn metal foil.

#### **S1. 4. Electrochemistry**

Electrochemical tests were performed in a CR2016-type coin cell assembled in an Ar-filled glove-box. The slurry of 70 wt%  $\text{Na}_{0.67}\text{MnPO}_4$  or  $\text{Li}_{0.67}\text{MnPO}_4$ , 20 wt% carbon black (Super-P), and 10 wt% polyvinylidene fluoride dispersed in N-methyl-2-pyrrolidone (NMP) was prepared and cast on aluminum foil. NMP was evaporated at  $120^\circ\text{C}$  for 2 hours. Electrochemical cells were assembled in a CR2016 type coin cell with a Li counter electrode, separator (Celgard 2400), and 1 M  $\text{LiPF}_6$  electrolyte in a mixture of 1:1 ethyl carbonate/dimethyl carbonate in an Ar-filled glove box. The charge/discharge test was performed using a galvanostat (WonA Tech).

#### **S1.5. Electrical Conductivity (ac) Measurements**

The powder was pressed into pellets with 15 mm diameters and  $\sim 2$  mm thicknesses using a uniaxial press ( $400 \text{ kg cm}^{-2}$ ). It was further compacted at 200 MPa for 5 min by cold isostatic

press and sintered at 300 °C during 12 hour. The 50 nm-thick platinum layers were deposited on both sides of the pellet by sputtering. The bulk conductivities of the pellet was measured using two-probe ac impedance spectroscopy (models 1260 and 1296; Solatron, UK) and the ZView electrochemical impedance software (Scribner Associates, U.S.). EIS data were recorded from 10 MHz to 1 Hz. Bulk conductivities ( $\sigma$ ) were calculated from both the geometries of the pellets and the bulk resistance values, which were obtained by one-circle fitting of the high-frequency region in the EIS spectra. Finally, activation energies ( $E_a$ ) were obtained using linear interpolation of the conductivity values at various temperatures by the Arrhenius equation:  $\sigma T = \sigma_0 \exp(-E_a/k_B T)$ , where  $\sigma$  is conductivity,  $T$  is temperature,  $E_a$  is activation energy, and  $k_B$  is the Boltzmann constant.

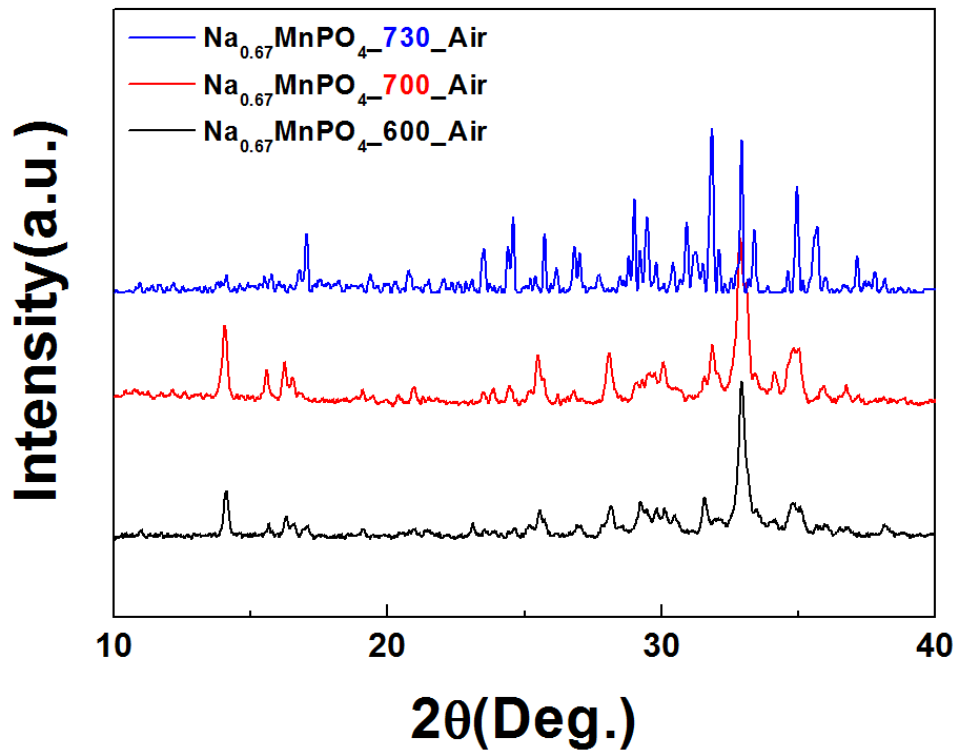

**Figure S1.** The XRD patterns of alluaudite  $\text{Na}_{0.67}\text{MnPO}_4$  at various calcination temperature (600°C, 700°C, and 750°C) in air condition

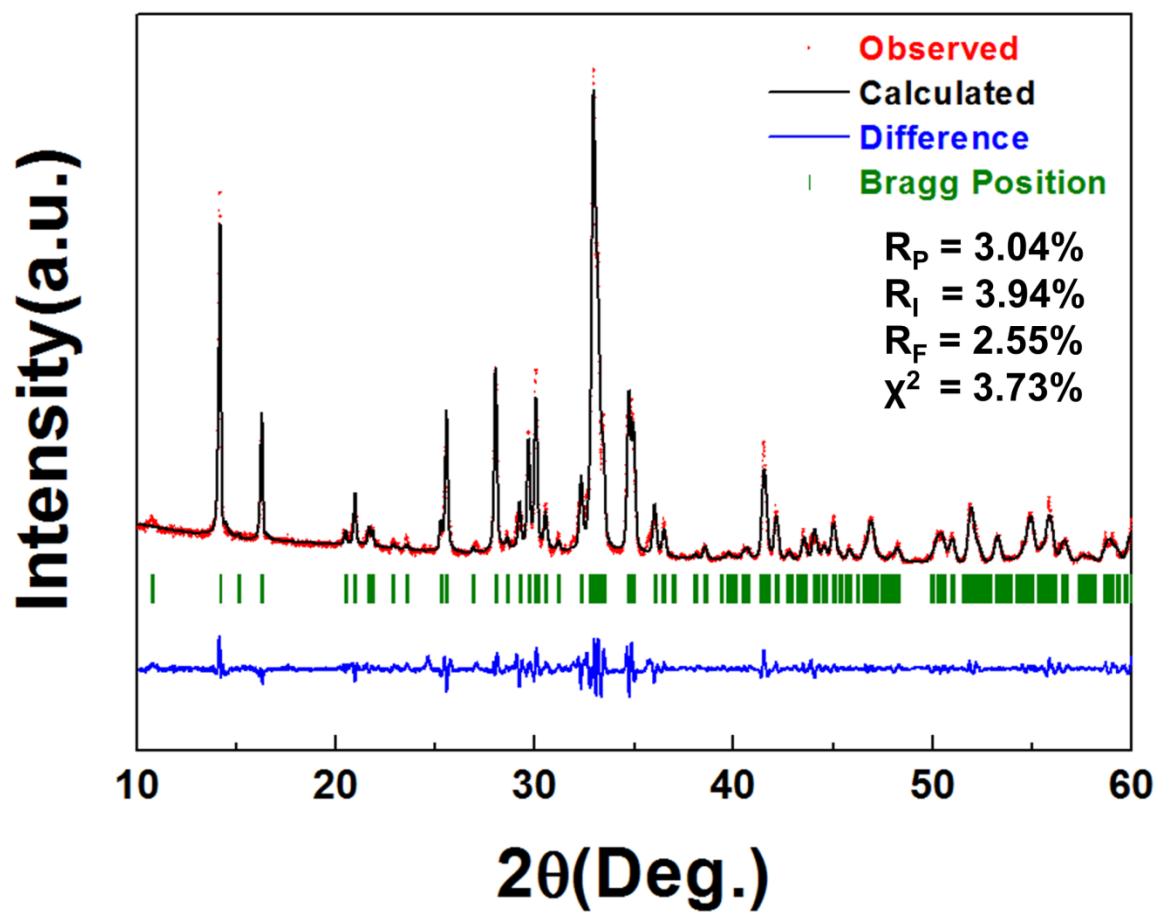

Figure S2. The XRD pattern of alluaudite  $\text{Na}_{0.67}\text{MnPO}_4$

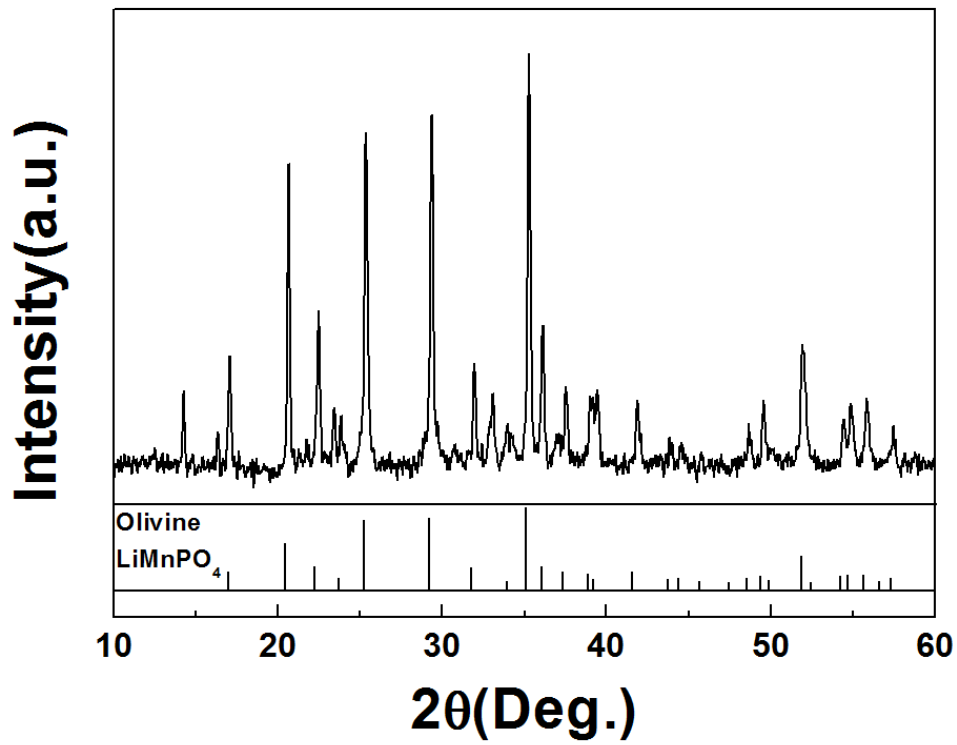

**Figure S3.** The XRD pattern of ion-exchanged alluaudite  $\text{Li}_{0.67}\text{MnPO}_4$  at harsh condition (The powder was mixed with 10 times excess amount of the eutectic composition of  $\text{LiNO}_3$  and  $\text{LiCl}$  for 1 hours at  $280^\circ\text{C}$ )

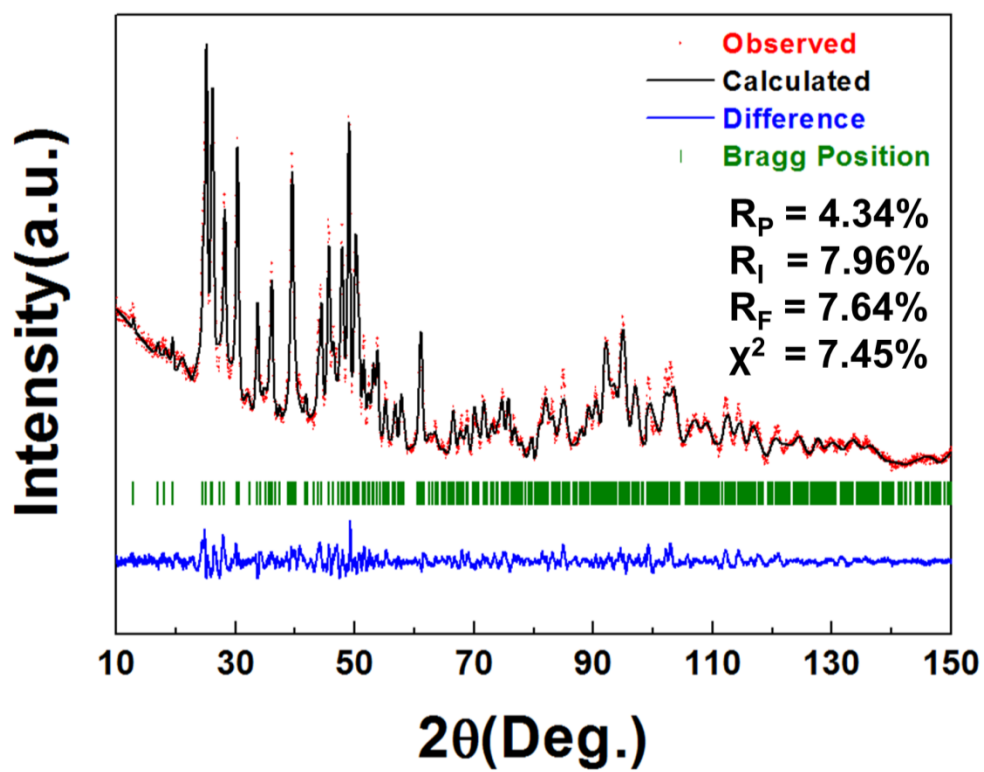

Figure S4. The refined ND pattern of alluaudite  $\text{Li}_{0.67}\text{MnPO}_4$



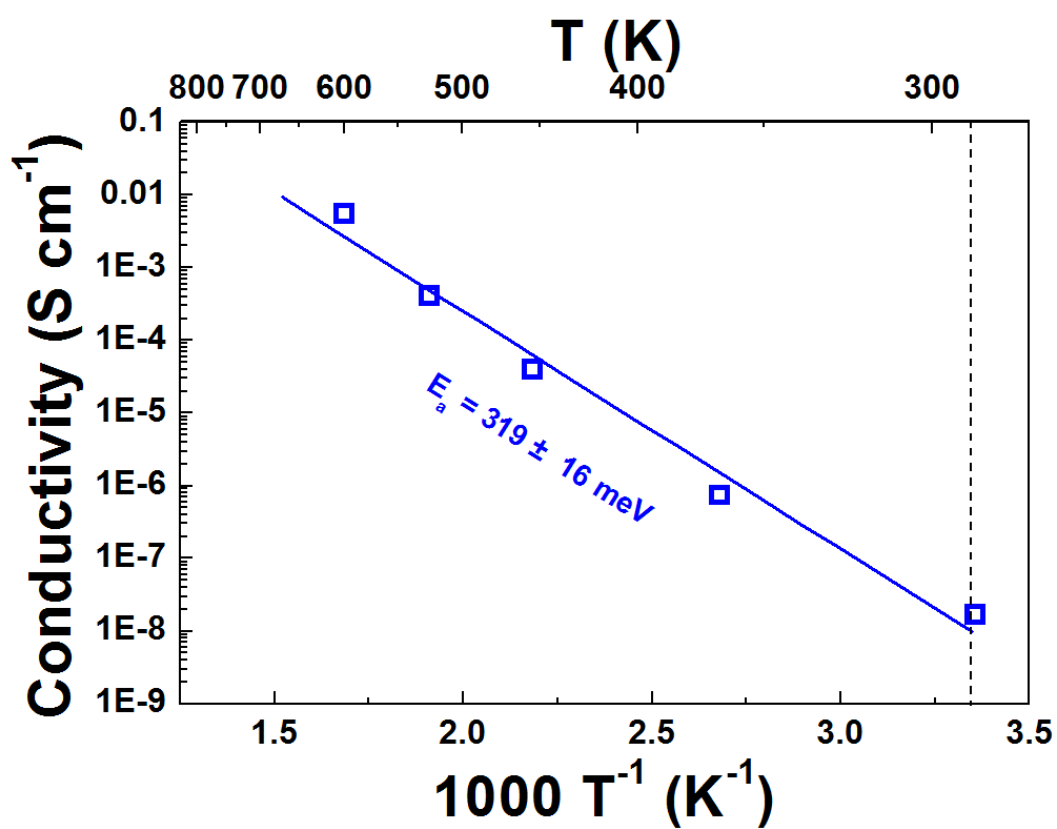

**Supporting Figure S5.** Arrhenius plot of electrical conductivity of  $\alpha$ -Li<sub>0.67</sub>MnPO<sub>4</sub> pellet at various temperatures. Activation energies ( $E_a$ ) were calculated from the slopes of the fitted lines.  $E_a$  for the former and the latter were  $319 \pm 16$ , respectively

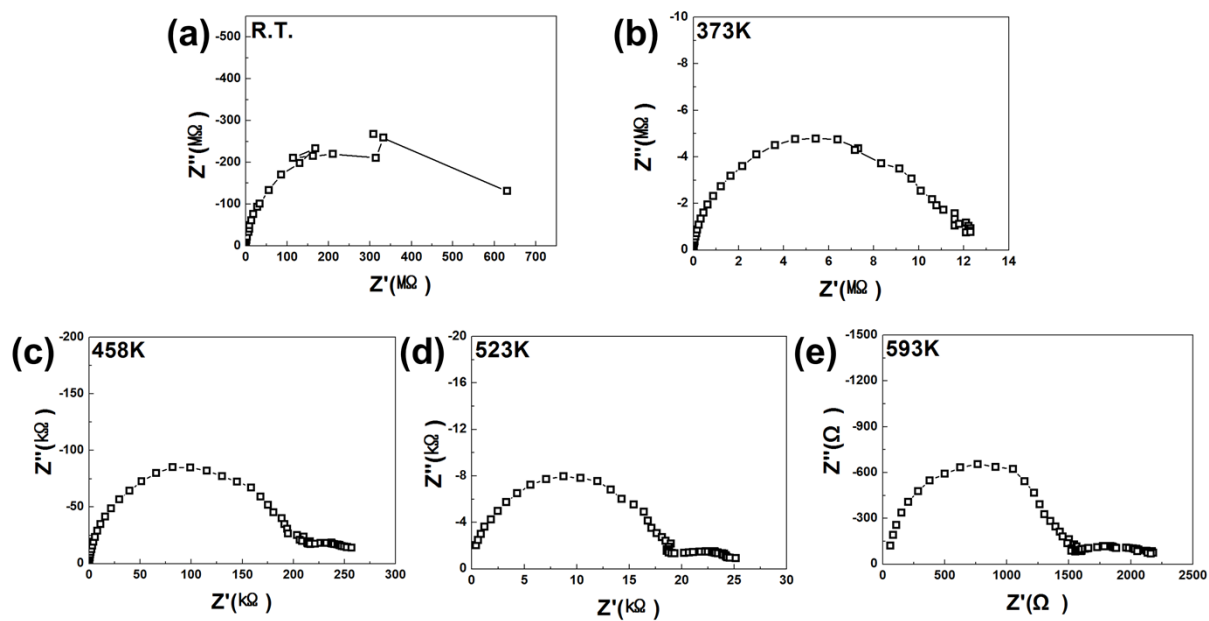

**Supporting Figure S6.** Electrochemical impedance spectroscopy (EIS) spectra of  $\alpha$ - $\text{Li}_{0.67}\text{MnPO}_4$  at (a) room temperature, (b) 373K, (c) 458K, (d) 523K, and (e) 593K.

|                                          |                 | <b>Lattice<br/>parameter</b> |
|------------------------------------------|-----------------|------------------------------|
| <b>Na<sub>0.67</sub>MnPO<sub>4</sub></b> | <b><i>a</i></b> | 12.0724(4) Å                 |
|                                          | <b><i>b</i></b> | 12.4615(5) Å                 |
|                                          | <b><i>c</i></b> | 6.6770(2) Å                  |
|                                          | <b><i>β</i></b> | 115.775(6) Å                 |

**Table S1.** Lattice parameters of alluaudite Na<sub>0.67</sub>MnPO<sub>4</sub>
